# Supplementary material for: Preparation of multiformable supramolecular gels through helical complexation by amylose in vine-twining polymerization
Source: Royal Society of Chemistry journal article supplement (doi:10.1039/c5py00753d), 2015-01-01
Supplement: c5py00753d1.pdf [file c5py00753d1.pdf]

## Supplementary Information

# Preparation of Multiformable Supramolecular Gels through Helical Complexation by Amylose in Vine-Twining Polymerization

Jun-ichi Kadokawa\*, Kazuya Tanaka, Daisuke Hatanaka and Kazuya Yamamoto

Department of Chemistry, Biotechnology, and Chemical Engineering, Graduate School  
of Science and Engineering, Kagoshima University, 1-21-40 Korimoto, Kagoshima  
890-0065, Japan

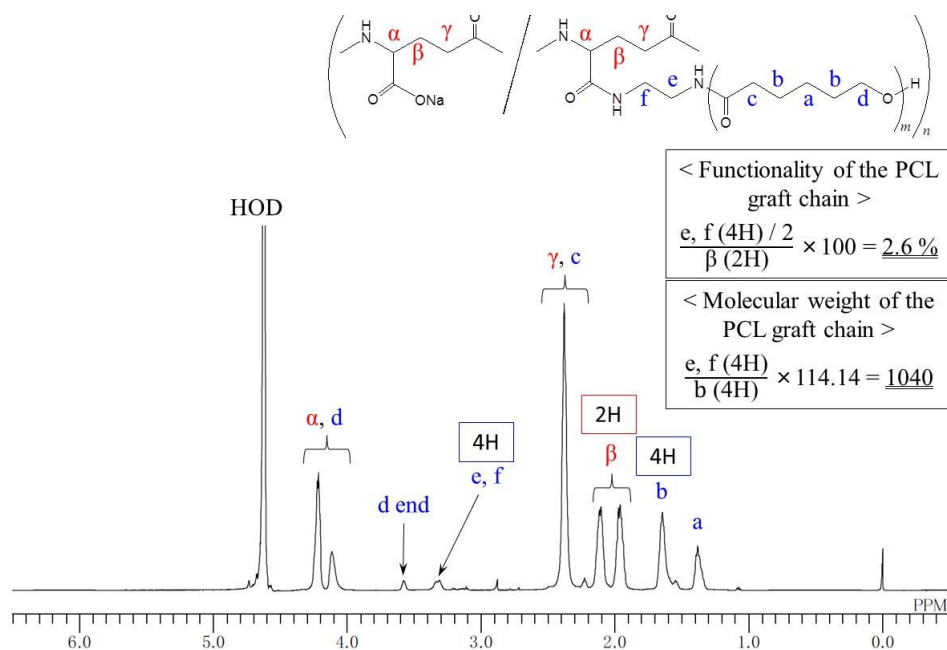

**Fig. S1.** <sup>1</sup>H NMR spectrum of poly(γ-glutamic acid-*graft*-ε-caprolactone) in D<sub>2</sub>O.

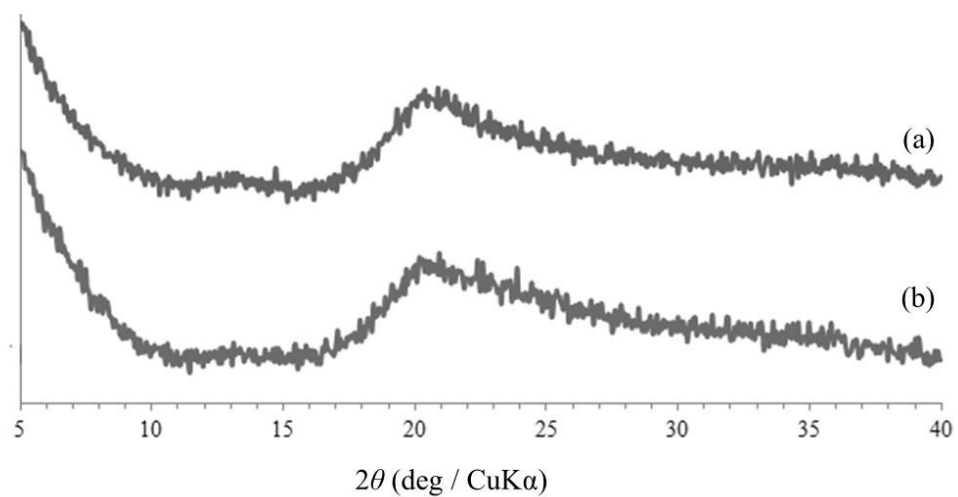

**Fig. S2.** XRD patterns of lyophilized samples from supramolecular hydrogels of runs 1 and 2 (a and b, respectively).
